# Supplementary material for: Risk and protective factors associated with brain grey matter patterns in a population-based cohort of cognitively unimpaired 70-year-olds
Source: Research Square preprint supplement (doi:10.21203/rs.3.rs-7349116/v1), 2025-08-27
Supplement: Supplementary file 1 [file 4cd1bada4e60087f3f250098.docx]

**SUPPLEMENTARY MATERIALS**

**Supplementary Figure 1.** Clustering output plots. **(A)** Two-dimensional multidimensional scaling (MDS) representation of the similarity matrix. Each dot represents a subject, with distances reflecting the similarity of their cortical and subcortical patterns. **(B)** Hierarchical clustering dendrogram. The horizontal axis indicates the distance between subjects based on random forest similarity, while the vertical axis shows the hierarchical grouping structure. Colors represent different subtypes, as indicated in the legend.


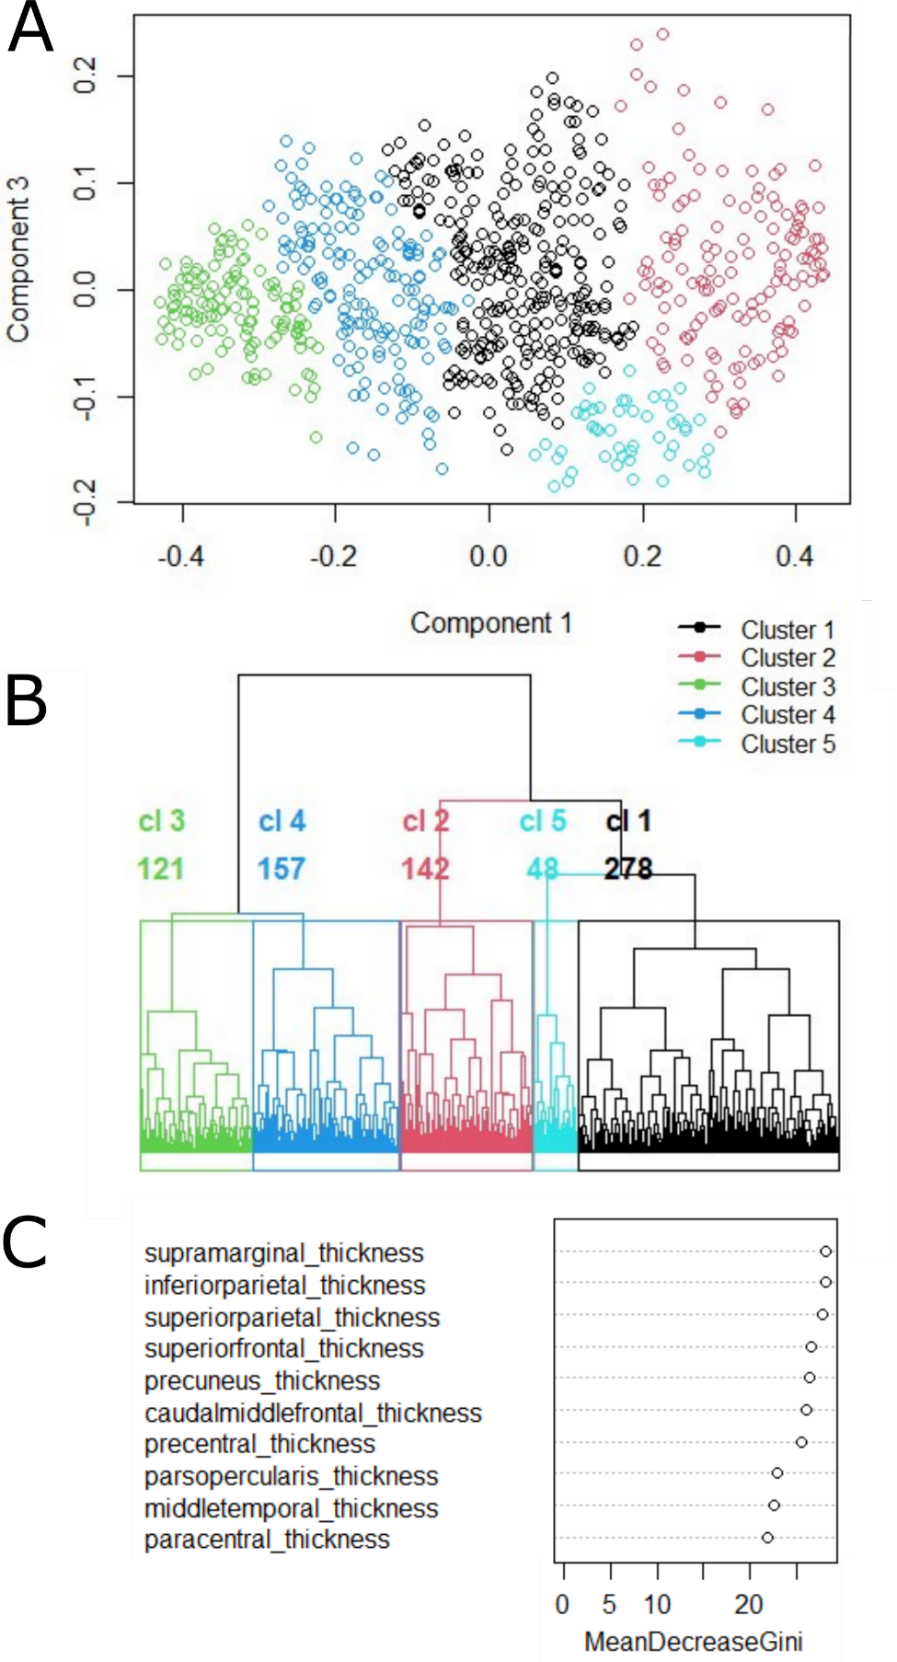


**Supplementary Figure 2.** Gray matter clusters.The five identified patterns of cortical thickness (left) and subcortical volume (right) compared to the sample mean.


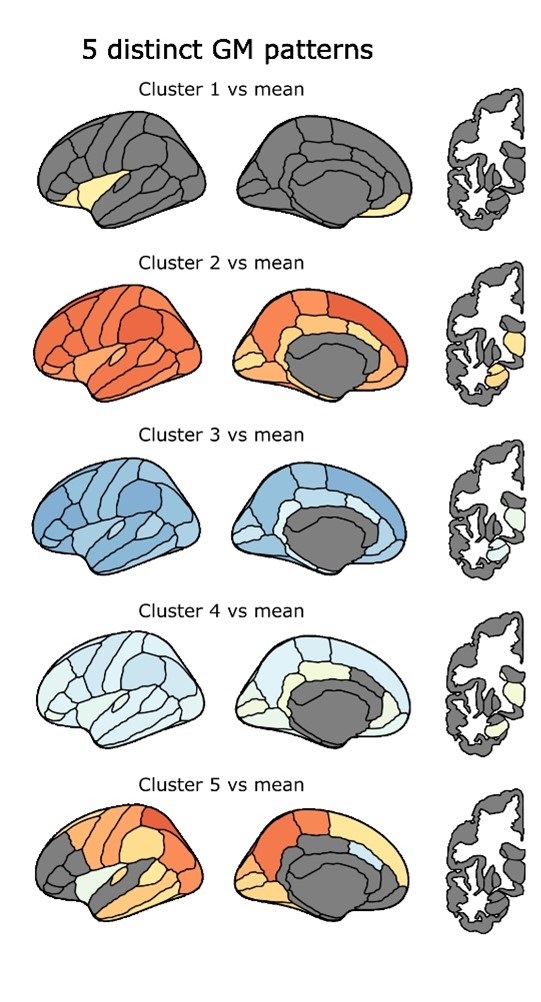

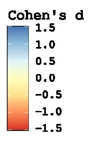


**Supplementary Figure 3**. Cortical ROI rankings based on Cohen’s d effect sizes (averaged across hemispheres) for pairwise comparisons between each cluster and Cluster 1. The plot highlights the three brain regions (ROIs) with the strongest discriminative power for differentiating participant clusters.

**
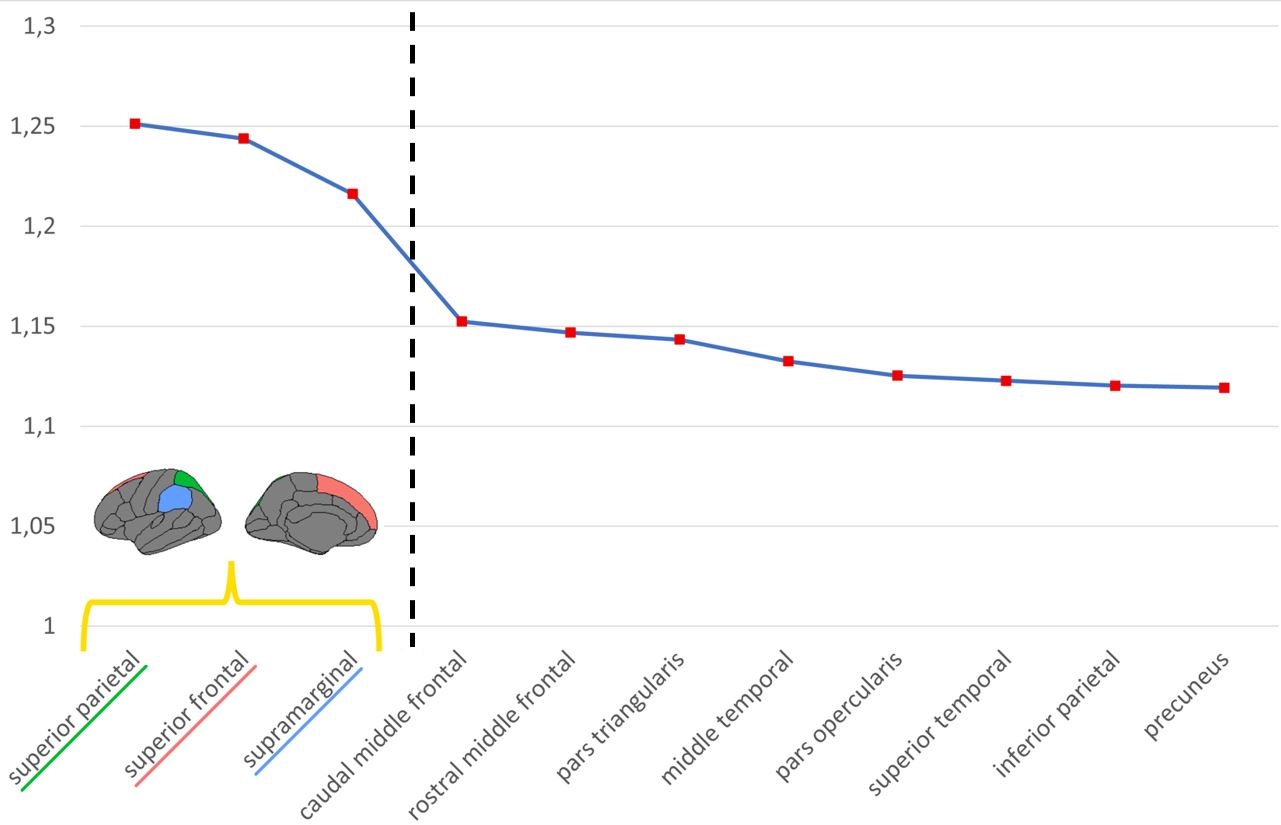
**


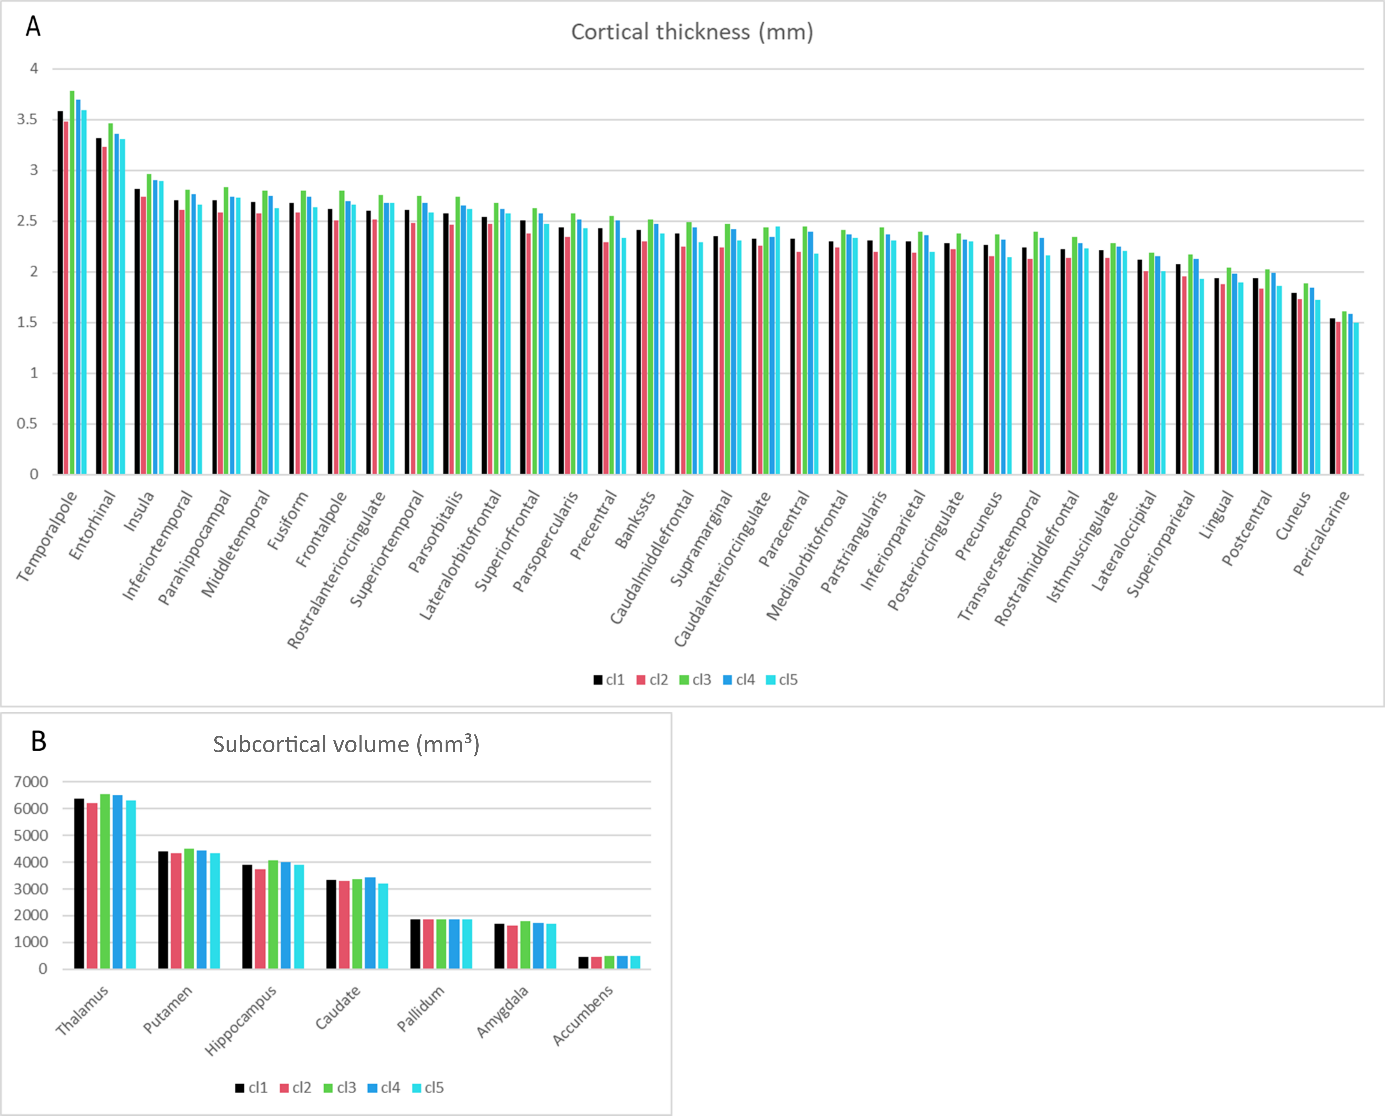
**Supplementary Figure 4**. Baseline brain ROI values by cluster. **(A)** Cortical thickness (mm) across all cortical regions. **(B)** Subcortical volumes (mm³) across all subcortical regions. All values are averages across hemispheres.

**Supplementary Table 1**. Baseline CSF biomarkers of Alzheimer’s disease in a sub-sample of 286 participants from the Gothenburg H70– Birth Cohort 1944 by cluster.

|  | **Cluster 1 (N=103)** | **Cluster 2 (N=59)** | **Cluster 3 (N=45)** | **Cluster 4 (N=60)** | **Cluster 5 (N=19)** | **Total (N=286)** | **p *** |
| --- | --- | --- | --- | --- | --- | --- | --- |
| **Aβ 1-42 positive** | 50 (49.0) | 24 (42.1) | 18 (40.0) | 29 (49.2) | 10 (52.6) | 131 (46.5) | 0.750 |
| **Total tau positive** | 30 (29.1) | 14 (23.7) | 14 (31.1) | 22 (36.7) | 11 (57.9) | 91 (31.8) | 0.204 |
| **p-tau 181 positive** | 6 (5.8) | 2 (3.4) | 1 (2.2) | 5 (8.3) | 2 (10.5) | 16 (5.6) | 0.750 |

*Note.* Data are presented as numbers (percentage) for categorical variables. Pathological cut-off values for biomarker positivity were defined as follows: β-amyloid 42 (Aβ42) ≤ 530 pg/mL, total tau (t-tau) ≥ 350 pg/mL, and phosphorylated tau at threonine 181 (p-tau181) ≥ 80 pg/mL.

Abbreviations: CSF, cerebrospinal fluid.

Missing data: Amyloid-β 1-42 (n=4).

*p value <0.05.

**Supplementary Table 2.** Comparison of baseline characteristics between participants with and without CSF data in the Gothenburg H70– Birth Cohort 1944.

|  | **CSF subsample (N=286)** | **CSF not available (N=460)** | **Total (N=746)** | **p *** |
| --- | --- | --- | --- | --- |
| **Sociodemographic and genetic factors** | | | | |
| Sex |  |  |  | 0.231 |
| Men | 147 (51.4) | 206 (44.8) | 353 (47.3) |  |
| Women | 139 (48.6) | 254 (55.2) | 393 (52.7) |  |
| Education, years |  |  |  | 0.189 |
| Primary school | 33 (11.5) | 49 (10.7) | 82 (11.0) |  |
| Secondary school | 159 (55.6) | 209 (45.5) | 368 (49.4) |
| Higher education | 94 (32.9) | 201 (43.8) | 295 (39.6) |
| APOE ε4 (one/two) | 102 (36.2) | 138 (30.8) | 240 (32.9) | 0.307 |
| MMSE score | 28.98 ± 1.23 | 29.16 ± 1.11 | 29.09 ± 1.16 | 0.047 |
|  |  |  |  |  |
| **Cardiovascular risk factors** | | | | |
| Current/former smoking | 177 (62.1) | 279 (60.9) | 456 (61.4) | 0.811 |
| Alcohol risk consumption | 83 (29.1) | 152 (33.1) | 235 (31.6) | 0.490 |
| Physical inactivity | 8 (2.8) | 17 (3.8) | 25 (3.4) | 0.626 |
| Overweight/obese (BMI ≥25 kg/m2) | 143 (52.0) | 257 (59.6) | 400 (56.7) | 0.192 |
| Elevated triglycerides | 94 (32.9) | 179 (39.2) | 273 (36.7) | 0.231 |
| Reduced HDL cholesterol | 27 (9.4) | 59 (12.9) | 86 (11.6) | 0.307 |
| LDL cholesterol |  |  |  | 0.857 |
| T1 (≤3) | 95 (33.2) | 160 (35.1) | 255 (34.4) |  |
| T2 (3.1-3.9) | 99 (34.6) | 156 (34.2) | 255 (34.4) |  |
| T3 (≥4) | 92 (32.2) | 140 (30.7) | 232 (31.3) |  |
| Hypertension (≥140/90 mmHg) | 210 (73.4) | 309 (67.3) | 519 (69.7) | 0.231 |
|  |  |  |  |  |
| **Medical conditions** | | | | |
| Heart disease | 40 (14.0) | 92 (20.0) | 132 (17.7) | 0.189 |
| Stroke/TIA | 14 (4.9) | 43 (9.3) | 57 (7.6) | 0.189 |
| Diabetes |  |  |  | 0.626 |
| Normoglycemia | 124 (43.4) | 189 (41.2) | 313 (42.0) |  |
| Prediabetes | 126 (44.1) | 197 (42.9) | 323 (43.4) |
| Diabetes | 36 (12.6) | 73 (15.9) | 109 (14.6) |
| Depression (major/minor) | 26 (9.1) | 33 (7.2) | 59 (7.9) | 0.571 |
| Traumatic brain injuries | 99 (34.6) | 143 (31.1) | 242 (32.4) | 0.566 |
|  |  |  |  |  |
| **Blood biomarkers** | | | | |
| Homocysteine > 13 µmol/L | 104 (36.6) | 167 (37.4) | 271 (37.1) | 0.856 |
| C-reactive protein ≥ 8 mg/L | 20 (7.1) | 36 (8.1) | 56 (7.7) | 0.745 |
| **Neuroimaging biomarkers** |  |  |  |  |
| Mean cortical thickness (mm) | 2.35 ± 0.08 | 2.35 ± 0.08 | 2.35 ± 0.08 | 0.269 |
| Average Fractional Anisotropy |  |  |  | 0.626 |
| T1 (<0.3) | 85 (31.4) | 152 (34.6) | 237 (33.4) |  |
| T2 (0.3 - 0.4) | 89 (32.8) | 148 (33.7) | 237 (33.4) |  |
| T3 (>0.4) | 97 (35.8) | 139 (31.7) | 236 (33.2) |  |
| WMHV (mm3) |  |  |  | 0.626 |
| T1 (<2.7) | 97 (34.0) | 151 (33.0) | 248 (33.4) |  |
| T2 (2.7 – 5.5) | 101 (35.4) | 147 (32.1) | 248 (33.4) |  |
| T3 (>5.5) | 87 (30.5) | 160 (34.9) | 247 (33.2) |  |
| Cerebral microbleeds | 25 (8.8) | 56 (12.3) | 81 (10.9) | 0.307 |
| Lacunes (3-15 mm) | 27 (9.5) | 25 (5.5) | 52 (7.0) | 0.189 |
| Large infarctions | 5 (1.8) | 10 (2.2) | 15 (2.0) | 0.785 |
| Enlarged PVS CS |  |  |  | 0.189 |
| 0-10 | 63 (22.2) | 133 (29.1) | 196 (26.5) |  |
| 11 | 221 (77.8) | 324 (70.9) | 545 (73.5) |  |
| Enlarged PVS BG |  |  |  | 0.626 |
| 0-10 | 219 (77.1) | 364 (79.6) | 583 (78.7) |  |
| 11 | 65 (22.9) | 93 (20.4) | 158 (21.3) |  |

*Note.* Data are presented as Mean ± Standard deviations for continuous variables or number (percentage) for categorical variables. Abbreviations: APOE-ɛ4, apolipoprotein E gene-ɛ4 allele; MMSE, Mini-Mental State Examination; BMI, body mass index; HDL, High-density lipoprotein; LDL, Low-density lipoprotein; TIA, transient ischemic attack; MRI, Magnetic Resonance Imaging; AD, Alzheimer’s Disease; DTI, diffusion tensor imaging; FA, fractional anisotropy; WMHV, white matter hyperintensities volume; PVS, perivascular spaces.

Missing data: Education (n=1), APOE-ɛ4 (n=16), MMSE (n=4), Smoking (n=3), Alcohol consumption (n=2), Physical activity (n=15), BMI (n=2), Elevated triglycerides (n=3), Reduced HDL cholesterol (n=4), LDL cholesterol (n=4), Hypertension (n=1), Heart disease (n=1), Prediabetes/diabetes (n=1), Depression (n=2), FA (n=36), Homocysteine (n=16), C-reactive protein (n=16), WMHV (n=3), Cerebral microbleeds (n=6), Lacunes (n=3), Large infarctions (n=4), Enlarged PVS Centrum semiovale (n=5), Enlarged PVS Basal ganglia (n=5). * p value <0.05.

**Supplementary Table 3**. Odds ratios (ORs) and 95% confidence intervals (CIs) from four multinomial regression models (clinical, neuroimaging, inflammation, and CSF), comparing baseline clusters with Cluster 1 as the reference. CSF analyses were performed in a subset of 286 participants. Asterisks (*) indicate statistical significance.

|  | **Cluster 2** | | | | **Cluster 3** | | | | **Cluster4** | | | | **Cluster 5** | | | |
| --- | --- | --- | --- | --- | --- | --- | --- | --- | --- | --- | --- | --- | --- | --- | --- | --- |
|  | **OR** | | **95% CI** | | **OR** | | **95% CI** | | **OR** | | **95% CI** | | **OR** | | **95% CI** | |
| **Clinical model** | | | | | | | | | | | | | | | | |
| Sex |  |  | |  |  |  | |  |  |  | |  |  |  | |  |
| Men | Reference | | | | Reference | | | | Reference | | | | Reference | | | |
| Women | 1.13 | 0.70 | | 1.83 | 1.16 | 0.71 | | 1.88 | 1.20 | 0.76 | | 1.90 | 1.50 | 0.74 | | 3.03 |
| Education |  |  | |  |  |  | |  |  |  | |  |  |  | |  |
| Primary/lower secondary | Reference | | | | Reference | | | | Reference | | | | Reference | | | |
| Higher secondary | 1.27 | 0.64 | | 2.54 | 2.06 | 0.84 | | 5.04 | 2.14 | 0.94 | | 4.86 | 0.63 | 0.23 | | 1.73 |
| Higher education | 0.93 | 0.44 | | 1.99 | 2.13 | 0.84 | | 5.38 | **2.52*** | **1.08** | | **5.87** | 1.09 | 0.39 | | 3.02 |
| APOE ε |  |  | |  |  |  | |  |  |  | |  |  |  | |  |
| No ε allele | Reference | | | | Reference | | | | Reference | | | | Reference | | | |
| One/two ε allele | 1.19 | 0.74 | | 1.92 | 0.95 | 0.57 | | 1.57 | 1.16 | 0.73 | | 1.84 | 1.19 | 0.59 | | 2.40 |
| Current/former smoking | 1.08 | 0.67 | | 1.74 | 0.86 | 0.54 | | 1.38 | **0.62*** | **0.40** | | **0.95** | 0.79 | 0.40 | | 1.56 |
| Alcohol risk consumption | **1.83*** | **1.13** | | **2.97** | 1.12 | 0.67 | | 1.86 | 0.93 | 0.57 | | 1.53 | **2.09*** | **1.05** | | **4.16** |
| Physical inactivity | 0.62 | 0.20 | | 1.99 | 0.55 | 0.11 | | 2.66 | 0.48 | 0.10 | | 2.35 | 1.82 | 0.43 | | 7.63 |
| Overweight/obese (BMI ≥25 kg/m2) | 1.09 | 0.67 | | 1.79 | **0.57*** | **0.35** | | **0.94** | 1.04 | 0.65 | | 1.66 | 0.89 | 0.43 | | 1.83 |
| Elevated triglycerides | 1.06 | 0.63 | | 1.79 | 0.91 | 0.52 | | 1.57 | **0.55*** | **0.32** | | **0.95** | 0.46 | 0.20 | | 1.06 |
| Reduced HDL cholesterol | 0.90 | 0.44 | | 1.83 | 0.82 | 0.36 | | 1.89 | 1.20 | 0.59 | | 2.43 | 0.97 | 0.32 | | 2.91 |
| LDL cholesterol |  |  | |  |  |  | |  |  |  | |  |  |  | |  |
| T1 (≤3) | Reference | | | | Reference | | | | Reference | | | | Reference | | | |
| T2 (3.1-3.9) | 0.89 | 0.50 | | 1.56 | 0.71 | 0.39 | | 1.29 | 1.19 | 0.68 | | 2.08 | 1.05 | 0.43 | | 2.59 |
| T3 (≥4) | 0.73 | 0.40 | | 1.31 | 0.83 | 0.46 | | 1.49 | 0.99 | 0.55 | | 1.76 | 1.80 | 0.75 | | 4.30 |
| Hypertension (≥140/90 mmHg) | 1.10 | 0.65 | | 1.89 | 1.02 | 0.61 | | 1.70 | 1.00 | 0.62 | | 1.62 | 1.04 | 0.49 | | 2.18 |
| Heart disease | 0.77 | 0.40 | | 1.49 | 1.27 | 0.65 | | 2.48 | 1.70 | 0.92 | | 3.15 | **3.44*** | **1.48** | | **8.01** |
| Stroke/TIA | 1.18 | 0.53 | | 2.62 | 0.94 | 0.36 | | 2.46 | 0.93 | 0.38 | | 2.24 | 1.20 | 0.35 | | 4.09 |
| Diabetes |  |  | |  |  |  | |  |  |  | |  |  |  | |  |
| Normoglycemia | Reference | | | | Reference | | | | Reference | | | | Reference | | | |
| Prediabetes | 1.00 | 0.59 | | 1.68 | 1.13 | 0.68 | | 1.88 | 0.91 | 0.56 | | 1.47 | 1.25 | 0.60 | | 2.63 |
| Diabetes | **2.54*** | **1.27** | | **5.06** | 0.85 | 0.36 | | 2.02 | 1.06 | 0.49 | | 2.28 | 1.50 | 0.48 | | 4.72 |
| Depression (major/minor) | 0.67 | 0.31 | | 1.45 | 0.77 | 0.35 | | 1.69 | **0.17*** | **0.05** | | **0.56** | 0.93 | 0.32 | | 2.66 |
| Traumatic brain injuries | 1.27 | 0.79 | | 2.04 | 1.04 | 0.63 | | 1.71 | 1.34 | 0.85 | | 2.13 | 0.86 | 0.41 | | 1.78 |
| **Neuroimaging model** | | | | | | | | | | | | | | | | |
| DTI’s Average FA |  |  | |  |  |  | |  |  |  | |  |  |  | |  |
| T1 (<0.3) | Reference | | | | Reference | | | | Reference | | | | Reference | | | |
| T2 (0.3 - 0.4) | 0.58 | 0.34 | | 1.01 | 1.20 | 0.64 | | 2.23 | 1.62 | 0.93 | | 2.80 | 0.96 | 0.44 | | 2.10 |
| T3 (>0.4) | **0.46** | **0.26** | | **0.83** | 1.59 | 0.87 | | 2.91 | 1.43 | 0.82 | | 2.52 | 0.53 | 0.22 | | 1.28 |
| WMHV, mm3 |  |  | |  |  |  | |  |  |  | |  |  |  | |  |
| T1 (<2.7) | Reference | | | | Reference | | | | Reference | | | | Reference | | | |
| T2 (2.7 – 5.5) | 0.86 | 0.48 | | 1.53 | **0.45*** | **0.26** | | **0.77** | **0.54*** | **0.33** | | **0.88** | 0.72 | 0.35 | | 1.47 |
| T3 (>5.5) | 1.30 | 0.72 | | 2.36 | **0.50*** | **0.27** | | **0.91** | 0.65 | 0.38 | | 1.12 | **0.23*** | **0.08** | | **0.64** |
| Cerebral microbleeds (presence) | 0.68 | 0.34 | | 1.34 | 0.96 | 0.47 | | 1.96 | 0.75 | 0.37 | | 1.51 | 0.15 | 0.02 | | 1.19 |
| Lacunes 3-15 mm | **0.35** | **0.14** | | **0.84** | 0.54 | 0.21 | | 1.39 | **0.18** | **0.05** | | **0.63** | 0.62 | 0.17 | | 2.31 |
| Large infarctions | 4.91 | 0.96 | | 25.23 | 2.06 | 0.18 | | 24.16 | 1.52 | 0.13 | | 17.86 | **17.44** | **1.95** | | **156.15** |
| Enlarged PVS in centrum semiovale |  |  | |  |  |  | |  |  |  | |  |  |  | |  |
| 0-10 | Reference | | | | Reference | | | | Reference | | | | Reference | | | |
| ≥11 | 1.23 | 0.72 | | 2.10 | 1.38 | 0.81 | | 2.35 | 1.18 | 0.73 | | 1.91 | 1.96 | 0.87 | | 4.44 |
| Enlarged PVS in basal ganglia |  |  | |  |  |  | |  |  |  | |  |  |  | |  |
| 0-10 | Reference | | | | Reference | | | | Reference | | | | Reference | | | |
| ≥11 | 1.52 | 0.88 | | 2.62 | 1.02 | 0.54 | | 1.91 | 1.37 | 0.79 | | 2.39 | 1.32 | 0.57 | | 3.05 |
| **Inflammation model** | | | | | | | | | | | | | | | | |
| Homocysteine > 13 µmol/L | 1.01 | 0.66 | | 1.52 | 0.76 | 0.48 | | 1.19 | 0.82 | 0.55 | | 1.24 | **0.40*** | **0.19** | | **0.84** |
| C-reactive protein ≥ 8 mg/L | 1.69 | 0.83 | | 3.47 | 1.32 | 0.59 | | 2.95 | 0.68 | 0.28 | | 1.66 | 2.02 | 0.76 | | 5.37 |
| **CSF model** | | | | | | | | | | | | | | | | |
| Amyloid-β 1-42 ≥ 530 pg/mL | 0.76 | 0.39 | | 1.45 | 0.69 | 0.34 | | 1.41 | 1.01 | 0.53 | | 1.91 | 1.16 | 0.43 | | 3.08 |
| Total tau ≥ 350 pg/mL | 0.76 | 0.36 | | 1.58 | 1.10 | 0.51 | | 2.35 | 1.41 | 0.72 | | 2.77 | **3.35*** | **1.22** | | **9.14** |
| Phosphorylated tau ≥ 80 pg/mL | 0.57 | 0.11 | | 2.91 | 0.37 | 0.04 | | 3.14 | 1.47 | 0.43 | | 5.04 | 1.90 | 0.35 | | 10.2 |

*Note.* Abbreviations: APOE-ɛ4, apolipoprotein E gene-ɛ4 allele; BMI, body mass index; HDL, High-density lipoprotein; LDL, Low-density lipoprotein; TIA, transient ischemic attack; DTI, diffusion tensor imaging; FA, fractional anisotropy; WMHV, white matter hyperintensities volume; PVS, perivascular spaces; CSF, cerebrospinal fluid. * p value <0.05.

**Supplementary Table 4.** β (beta estimates) of a panel of the six Generalized Linear Models (GLM) (global cognition, episodic memory, attention and perceptual speed, executive function, verbal fluency, visuospatial abilities) between clusters. Cluster 1 is set as reference for prediction measures. Asterisks (*)indicate statistical significance.

| ***Cluster 2*** | | | | |
| --- | --- | --- | --- | --- |
| **Cognitive Domain** | **β (Estimate)** | **SE** | **t value** | **p-value** |
| Global cognition | -0.122 | 0.063 | -1.943 | 0.052 |
| Episodic memory | -0.190 | 0.077 | -2.472 | **0.014 *** |
| Attention/Speed | -0.119 | 0.081 | -1.476 | 0.140 |
| Executive function | -0.157 | 0.082 | -1.910 | 0.057 |
| Verbal fluency | 0.017 | 0.088 | 0.190 | 0.849 |
| Visuospatial abilities | -0.209 | 0.103 | -2.022 | **0.044 *** |
| ***Cluster 3*** | | | | |
| **Cognitive Domain** | **β (Estimate)** | **SE** | **t value** | **p-value** |
| Global cognition | 0.079 | 0.067 | 1.177 | 0.239 |
| Episodic memory | 0.070 | 0.083 | 0.851 | 0.395 |
| Attention/Speed | 0.078 | 0.087 | 0.902 | 0.367 |
| Executive function | 0.005 | 0.088 | 0.055 | 0.956 |
| Verbal fluency | 0.161 | 0.094 | 1.714 | 0.087 |
| Visuospatial abilities | 0.053 | 0.110 | 0.481 | 0.631 |
| ***Cluster 4*** | | | | |
| **Cognitive Domain** | **β (Estimate)** | **SE** | **t value** | **p-value** |
| Global cognition | 0.158 | 0.061 | 2.575 | **0.010 *** |
| Episodic memory | 0.155 | 0.075 | 2.059 | **0.040 *** |
| Attention/Speed | 0.076 | 0.079 | 0.973 | 0.331 |
| Executive function | 0.068 | 0.080 | 0.846 | 0.398 |
| Verbal fluency | 0.237 | 0.086 | 2.771 | **0.006 **** |
| Visuospatial abilities | 0.222 | 0.099 | 2.229 | **0.026 *** |
| ***Cluster 5*** | | | | |
| **Cognitive Domain** | **β (Estimate)** | **SE** | **t value** | **p-value** |
| Global cognition | -0.036 | 0.096 | -0.373 | 0.709 |
| Episodic memory | -0.011 | 0.118 | -0.096 | 0.924 |
| Attention/Speed | -0.070 | 0.123 | -0.565 | 0.572 |
| Executive function | -0.122 | 0.125 | -0.976 | 0.329 |
| Verbal fluency | 0.096 | 0.134 | 0.716 | 0.474 |
| Visuospatial abilities | -0.070 | 0.159 | -0.436 | 0.663 |
|  |  |  |  |  |

**Supplementary Table 5.** Full model outputs (raw values) from mixed-effects models predicting **(A)** cognitive subdomains, **(B)** MMSE, **(C)** WMHV, and **(D)** GM outcomes. Cluster 1 serves as the reference category for all cluster comparisons. Estimates reflect fixed effects for intercepts (ref = Cluster 1) and interactions with time (baseline vs 2 years). Asterisk (*) indicates what remains significant after Bonferroni correction.

| A) | Attention/  Speed | | | Executive Function | | | Verbal Fluency | | | Visuospatial | | | Global Cognition | | |
| --- | --- | --- | --- | --- | --- | --- | --- | --- | --- | --- | --- | --- | --- | --- | --- |
| **β** | **SE** | **p** | **β** | **SE** | **p** | **β** | **SE** | **p** | **β** | **SE** | **p** | **β** | **SE** | **p** |
| Intercept | -0.696 | 0.128 | 0.000 | -0.772 | 0.127 | 0.000 | -1.220 | 0.145 | 0.000 | -0.870 | 0.135 | 0.000 | -0.915 | 0.108 | 0.000 |
| Time | -0.293 | 0.062 | 0.000 | -0.290 | 0.059 | 0.000 | -0.197 | 0.048 | 0.000 | -0.270 | 0.106 | 0.011 | -0.267 | 0.034 | 0.000 |
| Cluster 2 | -0.025 | 0.107 | 0.813 | -0.155 | 0.107 | 0.145 | 0.121 | 0.115 | 0.291 | -0.142 | 0.133 | 0.286 | -0.029 | 0.086 | 0.734 |
| Cluster 3 | 0.191 | 0.106 | 0.070 | 0.134 | 0.105 | 0.203 | 0.171 | 0.113 | 0.130 | 0.067 | 0.131 | 0.612 | 0.145 | 0.085 | 0.091 |
| Cluster 4 | 0.193 | 0.098 | 0.049 | 0.115 | 0.096 | 0.233 | 0.297 | 0.104 | 0.004 | 0.282 | 0.119 | 0.018 | 0.234 | 0.078 | 0.003 |
| Cluster 5 | 0.189 | 0.169 | 0.265 | 0.210 | 0.166 | 0.206 | 0.245 | 0.179 | 0.170 | 0.039 | 0.207 | 0.850 | 0.173 | 0.135 | 0.198 |
| Education (yrs) | 0.045 | 0.008 | 0.000 | 0.055 | 0.008 | 0.000 | 0.066 | 0.009 | 0.000 | 0.065 | 0.008 | 0.000 | 0.059 | 0.007 | 0.000 |
| Female sex | 0.014 | 0.066 | 0.827 | -0.040 | 0.064 | 0.531 | 0.320 | 0.075 | 0.000 | -0.175 | 0.065 | 0.007 | 0.042 | 0.056 | 0.452 |
| Time × Cluster 2 | 0.034 | 0.110 | 0.755 | 0.096 | 0.105 | 0.361 | **-0.226** | **0.085** | **0.008*** | -0.127 | 0.187 | 0.497 | -0.084 | 0.060 | 0.163 |
| Time × Cluster 3 | 0.037 | 0.108 | 0.732 | 0.084 | 0.103 | 0.415 | -0.116 | 0.082 | 0.156 | 0.130 | 0.186 | 0.485 | 0.031 | 0.060 | 0.598 |
| Time × Cluster 4 | -0.027 | 0.100 | 0.790 | -0.002 | 0.095 | 0.982 | -0.162 | 0.077 | 0.036 | -0.124 | 0.170 | 0.467 | -0.092 | 0.055 | 0.093 |
| Time × Cluster 5 | 0.023 | 0.173 | 0.894 | -0.175 | 0.162 | 0.281 | -0.239 | 0.131 | 0.068 | 0.139 | 0.292 | 0.635 | -0.077 | 0.095 | 0.417 |

*Note.* Bonferroni-corrected p-values (min p per Time × Cluster terms, adjusted for 5 models):
attention/speed = 1.000, executive function = 1.000, verbal fluency = 0.034, visuospatial = 1.000, global cognition = 0.463.

| **B) MMSE** | | **β** | | **SE** | | **p** | |
| --- | --- | --- | --- | --- | --- | --- | --- |
| **Intercept** | 0.000 | | 28.259 | | 0.179 | | 0.000 | |
| **Time** | 0.000 | | -0.324 | | 0.121 | | 0.008 | |
| **Cluster 2** | 0.734 | | 0.009 | | 0.146 | | 0.952 | |
| **Cluster 3** | 0.091 | | 0.209 | | 0.148 | | 0.158 | |
| **Cluster 4** | 0.003 | | -0.023 | | 0.136 | | 0.868 | |
| **Cluster 5** | 0.198 | | 0.293 | | 0.232 | | 0.206 | |
| **Education (yrs)** | 0.000 | | 0.053 | | 0.011 | | 0.000 | |
| **Female sex** | 0.452 | | 0.252 | | 0.092 | | 0.006 | |
| **Time × Cluster 2** | 0.163 | | -0.448 | | 0.212 | | **0.035 *** | |
| **Time × Cluster 3** | 0.598 | | -0.049 | | 0.212 | | 0.816 | |
| **Time × Cluster 4** | 0.093 | | 0.326 | | 0.195 | | 0.094 | |
| **Time × Cluster 5** | 0.417 | | -0.316 | | 0.336 | | 0.347 | |

| **C) WMHV** | **β** | **SE** | **p** |
| --- | --- | --- | --- |
| **Intercept** | 5.431 | 1.118 | <0.001 |
| **Time** | 2.954 | 0.357 | <0.001 |
| **Cluster 2** | 2.841 | 0.928 | 0.002 |
| **Cluster 3** | –1.011 | 0.910 | 0.267 |
| **Cluster 4** | –1.685 | 0.841 | 0.045 |
| **Cluster 5** | –2.935 | 1.440 | 0.042 |
| **Education (yrs)** | 0.027 | 0.068 | 0.693 |
| **Female sex** | –1.060 | 0.569 | 0.063 |
| **Time × Cluster 2** | 1.843 | 0.635 | **0.004 *** |
| **Time × Cluster 3** | –0.418 | 0.616 | 0.498 |
| **Time × Cluster 4** | –1.000 | 0.568 | 0.078 |
| **Time × Cluster 5** | –1.007 | 0.967 | 0.298 |

| D) | Superior frontal | | | Superior parietal | | | Supramarginal | | | AD signature | | | Resilience signature | | | Hippocampal volume | | | Mean thickness | | |
| --- | --- | --- | --- | --- | --- | --- | --- | --- | --- | --- | --- | --- | --- | --- | --- | --- | --- | --- | --- | --- | --- |
|  | **β** | **SE** | **p** | **β** | **SE** | **p** | **β** | **SE** | **p** | **β** | **SE** | **p** | **β** | **SE** | **p** | **β** | **SE** | **p** | **β** | **SE** | **p** |
| Intercept | 2.494 | 0.012 | 0.000 | 2.140 | 0.014 | 0.000 | 2.374 | 0.011 | 0.000 | 2.717 | 0.011 | 0.000 | 2.549 | 0.011 | 0.000 | 3815.370 | 60.674 | 0.000 | 2.373 | 0.006 | 0.000 |
| Time | 0.002 | 0.006 | 0.711 | -0.022 | 0.005 | 0.000 | -0.005 | 0.004 | 0.253 | 0.010 | 0.005 | 0.041 | -0.002 | 0.005 | 0.754 | -158.484 | 11.852 | 0.000 | -0.011 | 0.004 | 0.003 |
| Cluster 2 | -0.101 | 0.010 | 0.000 | -0.107 | 0.011 | 0.000 | -0.089 | 0.009 | 0.000 | -0.091 | 0.009 | 0.000 | -0.094 | 0.009 | 0.000 | -200.595 | 45.385 | 0.000 | -0.089 | 0.005 | 0.000 |
| Cluster 3 | 0.125 | 0.009 | 0.000 | 0.089 | 0.011 | 0.000 | 0.113 | 0.008 | 0.000 | 0.103 | 0.009 | 0.000 | 0.129 | 0.009 | 0.000 | 177.739 | 44.928 | 0.000 | 0.104 | 0.005 | 0.000 |
| Cluster 4 | 0.067 | 0.009 | 0.000 | 0.046 | 0.010 | 0.000 | 0.075 | 0.008 | 0.000 | 0.051 | 0.008 | 0.000 | 0.067 | 0.008 | 0.000 | 110.863 | 41.407 | 0.007 | 0.056 | 0.004 | 0.000 |
| Cluster 5 | -0.031 | 0.015 | 0.037 | -0.132 | 0.017 | 0.000 | -0.043 | 0.013 | 0.001 | -0.029 | 0.014 | 0.033 | -0.012 | 0.014 | 0.371 | 86.806 | 71.226 | 0.223 | -0.042 | 0.007 | 0.000 |
| Education (yrs) | 0.001 | 0.001 | 0.276 | 0.000 | 0.001 | 0.816 | 0.000 | 0.001 | 0.666 | 0.000 | 0.001 | 0.519 | 0.000 | 0.001 | 0.529 | 1.565 | 3.788 | 0.679 | 0.000 | 0.000 | 0.783 |
| Female sex | 0.038 | 0.006 | 0.000 | 0.008 | 0.007 | 0.263 | 0.022 | 0.006 | 0.000 | -0.003 | 0.006 | 0.569 | 0.037 | 0.006 | 0.000 | -33.142 | 31.278 | 0.289 | 0.011 | 0.003 | 0.001 |
| Time × Cluster 2 | -0.020 | 0.010 | 0.050 | 0.002 | 0.008 | 0.810 | -0.009 | 0.007 | 0.242 | -0.016 | 0.008 | 0.055 | -0.018 | 0.009 | 0.051 | -8.355 | 20.576 | 0.685 | -0.010 | 0.006 | 0.115 |
| Time × Cluster 3 | 0.001 | 0.010 | 0.916 | -0.012 | 0.008 | 0.126 | -0.011 | 0.007 | 0.133 | 0.003 | 0.008 | 0.748 | 0.002 | 0.009 | 0.787 | 1.851 | 20.955 | 0.930 | -0.004 | 0.006 | 0.528 |
| Time × Cluster 4 | -0.016 | 0.009 | 0.080 | -0.009 | 0.007 | 0.200 | -0.013 | 0.007 | 0.058 | 0.003 | 0.007 | 0.714 | -0.012 | 0.008 | 0.132 | -11.871 | 18.781 | 0.527 | -0.008 | 0.006 | 0.166 |
| Time × Cluster 5 | 0.016 | 0.016 | 0.324 | 0.033 | 0.013 | 0.010 | 0.025 | 0.012 | 0.030 | 0.027 | 0.013 | 0.038 | 0.016 | 0.014 | 0.270 | 54.136 | 32.170 | 0.092 | 0.019 | 0.010 | 0.044 |

*Note*. Bonferroni-corrected p-values (min p per Time × Cluster terms, adjusted for 7 models):
superior frontal = 0.352, superior parietal = 0.067, supramarginal = 0.211, AD signature = 0.267, resilience signature = 0. 355, hippocampal volume = 0.647, mean thickness = 0.307.

**Supplementary Table 6.** Odds ratios (ORs) and 95% confidence intervals (CIs) for mortality and study dropout across clusters, using Cluster 1 as the reference. Mortality (n = 33) and dropout (n = 123) were compared to participants who remained active in the study (n = 590). No associations reached statistical significance.

|  | **Cluster 2** | | | | **Cluster 3** | | | | **Cluster4** | | | | | **Cluster 5** | | | |
| --- | --- | --- | --- | --- | --- | --- | --- | --- | --- | --- | --- | --- | --- | --- | --- | --- | --- |
|  | **OR** | | **95% CI** | | **OR** | | **95% CI** | | **OR** | | **95% CI** | | | **OR** | | **95% CI** | |
| Active (n=590) | Reference | | | | Reference | | | | Reference | | | | | Reference | | | |
| Deceased (n=33) | 2.18 | 0.93 | | 5.11 | 0.57 | 0.15 | | 2.08 | 0.59 | 0.19 | | 1.90 | 1.67 | | 0.44 | | 6.28 |
| Dropout (n=123) | 0.87 | 0.50 | | 1.49 | 0.59 | 0.32 | | 1.09 | 0.68 | 0.39 | | 1.17 | 1.15 | | 0.54 | | 2.48 |
